# Supplementary material for: Assessing the performance of MM/PBSA and MM/GBSA methods. 7. Entropy effects on the performance of end-point binding free energy calculation approaches
Source: Royal Society of Chemistry journal article supplement (doi:10.1039/c7cp07623a), 2018-01-01
Supplement: c7cp07623a1.pdf [file c7cp07623a1.pdf]

# Assessing the performance of MM/PBSA and MM/GBSA methods. 7. Entropy effects on the performance of end-point binding free energy calculation approaches

Huiyong Sun,<sup>1,2</sup> Lili Duan,<sup>3</sup> Fu Chen,<sup>1</sup> Hui Liu,<sup>1</sup> Zhe Wang,<sup>1</sup> Peichen Pan,<sup>1</sup> Feng Zhu,<sup>1</sup> John Z. H. Zhang,<sup>3,4</sup> Tingjun Hou<sup>1,2,\*</sup>

## Supporting Information

**Table S1.** Information of the used dataset.

| PDB ID | $\Delta G_{\text{exp}}^a$ | Seq-length | PDBcode | $\Delta G_{\text{exp}}$ | Seq-length | PDBcode | $\Delta G_{\text{exp}}$ | Seq-length |
|--------|---------------------------|------------|---------|-------------------------|------------|---------|-------------------------|------------|
| 2e27   | -12.77                    | 224        | 1sdv    | -11.94                  | 199        | 2v7d    | -9                      | 457        |
| 3e64   | -9.71                     | 292        | 1sgu    | -7.34                   | 199        | 2v8w    | -9.32                   | 361        |
| 3e85   | -7.34                     | 155        | 1sh9    | -8.24                   | 199        | 2v95    | -11.34                  | 343        |
| 3e92   | -10.93                    | 349        | 1siv    | -11.03                  | 199        | 2vb8    | -6.29                   | 809        |
| 3e93   | -12.09                    | 347        | 1sld    | -8.97                   | 485        | 2vba    | -6.29                   | 809        |
| 10gs   | -8.74                     | 417        | 1slg    | -5.33                   | 489        | 2vc9    | -11.53                  | 885        |
| 11gs   | -7.96                     | 417        | 1sqn    | -12.84                  | 249        | 2vfk    | -5.07                   | 206        |
| 1a1b   | -8.74                     | 210        | 1sqo    | -10.18                  | 246        | 2vh6    | -13.25                  | 287        |
| 1a1c   | -8.74                     | 210        | 1sqt    | -8.47                   | 246        | 2vix    | -6.77                   | 837        |
| 1a30   | -5.88                     | 199        | 1sr7    | -13.79                  | 499        | 2vk2    | -9.41                   | 297        |
| 1a4k   | -10.93                    | 870        | 1srg    | -7.24                   | 465        | 2vkm    | -11.95                  | 390        |
| 1a94   | -10.73                    | 199        | 1stc    | -11.06                  | 352        | 2vl4    | -8.21                   | 837        |
| 1a99   | -7.78                     | 683        | 1str    | -6.52                   | 489        | 2vmf    | -8                      | 836        |
| 1a9m   | -9.46                     | 199        | 1sts    | -6.83                   | 489        | 2vnt    | -10.93                  | 259        |
| 1aaq   | -11.47                    | 199        | 1sv3    | -5.94                   | 122        | 2vo4    | -6.74                   | 439        |
| 1adl   | -7.32                     | 263        | 1sw2    | -9.87                   | 271        | 2vo5    | -6.67                   | 834        |
| 1afk   | -9.04                     | 125        | 1swg    | -10.05                  | 464        | 2vot    | -9.76                   | 838        |
| 1ai4   | -3.42                     | 764        | 1swr    | -9.45                   | 472        | 2vqt    | -8.2                    | 837        |
| 1ai7   | -5.58                     | 764        | 1syh    | -8.75                   | 519        | 2vr4    | -7.76                   | 837        |
| 1aid   | -6.59                     | 199        | 1t4v    | -10.49                  | 276        | 2vt3    | -5.68                   | 394        |
| 1aj6   | -8.09                     | 195        | 1t5f    | -5.77                   | 943        | 2vvc    | -11.64                  | 286        |
| 1aj7   | -5.29                     | 432        | 1t7d    | -8.23                   | 209        | 2vvp    | -4.64                   | 315        |
| 1ajp   | -3.05                     | 764        | 1t7j    | -11.88                  | 199        | 2vvu    | -11.06                  | 288        |
| 1ajq   | -5.89                     | 764        | 1tew    | -8.22                   | 199        | 2vvv    | -11.23                  | 289        |
| 1ajv   | -10.54                    | 199        | 1tcx    | -9.49                   | 199        | 2vw5    | -11.64                  | 215        |
| 1ajx   | -10.81                    | 199        | 1td7    | -5.96                   | 120        | 2vwc    | -9.04                   | 215        |
| 1alw   | -8.91                     | 347        | 1tng    | -4                      | 224        | 2vwm    | -9.61                   | 285        |
| 1amw   | -6.2                      | 427        | 1tog    | -4.4                    | 791        | 2vwn    | -10.93                  | 281        |
| 1apv   | -12.29                    | 324        | 1toi    | -5.53                   | 791        | 2vx9    | -10.17                  | 757        |
| 1apw   | -10.93                    | 324        | 1toj    | -4.63                   | 791        | 2vxn    | -6.83                   | 499        |
| 1ax0   | -4.27                     | 479        | 1tok    | -3.37                   | 791        | 2vyt    | -3.74                   | 215        |
| 1axz   | -4.37                     | 240        | 1tom    | -11.34                  | 277        | 2vzr    | -5.85                   | 126        |
| 1b05   | -9.73                     | 518        | 1tpw    | -4.51                   | 491        | 2w26    | -12.84                  | 286        |
| 1b0h   | -9.15                     | 518        | 1trd    | -7.37                   | 527        | 2w47    | -6.8                    | 136        |

|      |        |     |      |        |     |      |        |     |
|------|--------|-----|------|--------|-----|------|--------|-----|
| 1b1h | -9.61  | 518 | 1tuf | -5.53  | 867 | 2w4x | -6.63  | 580 |
| 1b2h | -6.2   | 518 | 1tx7 | -6.29  | 224 | 2w5g | -8.29  | 125 |
| 1b32 | -9.7   | 518 | 1tys | -7.49  | 527 | 2w5i | -6.2   | 124 |
| 1b3f | -9.41  | 518 | 1u1b | -10.65 | 125 | 2w66 | -5.53  | 648 |
| 1b3g | -9.15  | 518 | 1u1w | -8     | 558 | 2w67 | -6.77  | 643 |
| 1b3h | -8.48  | 518 | 1u33 | -6.29  | 496 | 2w7y | -8.31  | 381 |
| 1b3l | -8.04  | 518 | 1ua4 | -5.77  | 455 | 2w87 | -6.36  | 140 |
| 1b40 | -9.94  | 518 | 1ucn | -7.13  | 907 | 2w8j | -4.04  | 799 |
| 1b46 | -7.22  | 518 | 1ugp | -3.94  | 428 | 2w8w | -2.9   | 797 |
| 1b4h | -7.46  | 518 | 1ugw | -4.22  | 599 | 2w8y | -12.41 | 252 |
| 1b4z | -7.14  | 518 | 1ugx | -8.07  | 593 | 2wb5 | -12.47 | 586 |
| 1b51 | -10.06 | 518 | 1ui0 | -9.64  | 193 | 2wca | -7.65  | 579 |
| 1b52 | -9.72  | 516 | 1uj5 | -4.17  | 226 | 2web | -6.99  | 647 |
| 1b58 | -9     | 518 | 1uj6 | -4.17  | 222 | 2wec | -5.41  | 647 |
| 1b5h | -8.21  | 518 | 1uou | -10.52 | 877 | 2wed | -8.33  | 647 |
| 1b5i | -9.62  | 518 | 1upf | -6.29  | 897 | 2weq | -8.05  | 427 |
| 1b5j | -10.15 | 518 | 1ur9 | -7.88  | 996 | 2wer | -9.62  | 429 |
| 1b6h | -10.69 | 518 | lurg | -7.96  | 374 | 2whp | -5.46  | 531 |
| 1b6j | -10.82 | 195 | 1usi | -9.21  | 693 | 2wk2 | -9.32  | 540 |
| 1b6k | -11.95 | 195 | lutc | -6.22  | 353 | 2wk6 | -4.53  | 895 |
| 1b6l | -11.34 | 195 | lutj | -5.25  | 223 | 2wky | -11.73 | 509 |
| 1b6m | -11.47 | 195 | lutm | -4.11  | 223 | 2wl0 | -10.65 | 199 |
| 1b7h | -10.96 | 518 | luto | -3.11  | 224 | 2wly | -9.02  | 540 |
| 1b9j | -8.14  | 518 | 1uvt | -10.43 | 273 | 2wlz | -6.29  | 539 |
| 1bcu | -4.47  | 276 | luz1 | -9.41  | 440 | 2wm0 | -6.18  | 539 |
| 1bdq | -8.66  | 199 | luz4 | -4.64  | 411 | 2wq5 | -5.12  | 358 |
| 1bgq | -11.7  | 429 | luz8 | -6.77  | 431 | 2wqp | -7.52  | 679 |
| 1bhx | -9.34  | 283 | 1v0k | -6.96  | 303 | 2wtv | -11.95 | 263 |
| 1bjv | -7.56  | 224 | 1v0l | -10.32 | 303 | 2wtx | -3.94  | 895 |
| 1bq4 | -7.13  | 939 | 1v2k | -8.45  | 224 | 2wuf | -5.86  | 565 |
| 1br6 | -4.4   | 269 | 1v2n | -8.06  | 224 | 2wvt | -8.36  | 878 |
| 1bv7 | -12.71 | 199 | 1v2q | -5.65  | 224 | 2wvz | -5.49  | 739 |
| 1bv9 | -13.6  | 199 | 1v2r | -4.86  | 224 | 2wyg | -11.88 | 281 |
| 1bwa | -11.75 | 199 | 1v2s | -5.69  | 224 | 2wyj | -12.29 | 283 |
| 1bxo | -13.66 | 326 | 1v2t | -6.43  | 224 | 2wzm | -7.13  | 275 |
| 1bxq | -10.08 | 324 | 1v2u | -4.6   | 224 | 2wzs | -5.26  | 737 |
| 1byk | -6.83  | 511 | 1v2w | -5.48  | 224 | 2x09 | -5.13  | 852 |
| 1bzc | -6.72  | 298 | 1vja | -10.52 | 248 | 2x4z | -11.7  | 292 |
| 1bjz | -6.36  | 298 | 1vjj | -7.88  | 676 | 2xab | -12.66 | 210 |
| 1c3x | -5.02  | 799 | 1vso | -6.45  | 487 | 2xb7 | -12.55 | 287 |
| 1c4u | -14.16 | 283 | 1vwn | -7.96  | 485 | 2xba | -10.42 | 285 |
| 1c4v | -14.75 | 289 | 1vyf | -10.99 | 136 | 2xbw | -10.93 | 287 |
| 1c5n | -6.42  | 289 | 1vyq | -7.24  | 424 | 2xc4 | -10.99 | 289 |
| 1c5q | -8.68  | 224 | 1w0z | -10.49 | 248 | 2xde | -7.47  | 138 |
| 1c5s | -8.2   | 224 | 1w11 | -11.23 | 248 | 2xdk | -4.92  | 216 |
| 1c5t | -5.6   | 224 | 1w13 | -11.88 | 248 | 2xdl | -4.24  | 417 |
| 1c5x | -9.12  | 249 | 1w2g | -6.24  | 403 | 2xht | -8.14  | 214 |
| 1c5y | -5.74  | 249 | 1w3j | -8.63  | 444 | 2xjg | -10.69 | 214 |
| 1c5z | -5.48  | 246 | 1w3k | -5.88  | 301 | 2xjj | -8.89  | 209 |
| 1c70 | -14.07 | 199 | 1w3l | -8.58  | 301 | 2xjx | -12.5  | 222 |
| 1c83 | -6.63  | 298 | 1w4q | -7.18  | 125 | 2xmy | -13.6  | 296 |
| 1c84 | -6.84  | 298 | 1w5w | -12.02 | 199 | 2xnb | -9.33  | 297 |
| 1c86 | -6.42  | 297 | 1w5x | -11.47 | 199 | 2ypi | -6.59  | 495 |
| 1c87 | -5.74  | 298 | 1w6y | -7.32  | 253 | 2yxj | -12.71 | 138 |
| 1c88 | -7.23  | 298 | 1w7x | -11.47 | 303 | 2z4b | -12.78 | 446 |
| 1ce5 | -6.47  | 224 | 1w96 | -11.49 | 550 | 2z4o | -13.07 | 199 |
| 1cea | -6.77  | 161 | 1w9u | -8.32  | 396 | 2za5 | -11.52 | 973 |
| 1ceb | -8.2   | 81  | 1w9v | -8.66  | 396 | 2zaz | -8.74  | 346 |

|      |        |     |      |        |     |      |        |     |
|------|--------|-----|------|--------|-----|------|--------|-----|
| ld3d | -12.42 | 279 | lwcq | -8.55  | 602 | 2zb0 | -9.04  | 350 |
| ld3p | -10.09 | 279 | lwdn | -8.61  | 224 | 2zb1 | -8.63  | 346 |
| ld4h | -13.66 | 199 | lwei | -12.29 | 221 | 2zc9 | -9.21  | 280 |
| ld4j | -11.42 | 199 | lwht | -5.05  | 819 | 2zcs | -11.23 | 285 |
| ld4k | -12.6  | 195 | lwm1 | -8.61  | 314 | 2zda | -11.47 | 281 |
| ld4l | -11.98 | 195 | lws1 | -13.05 | 152 | 2zdk | -8.7   | 224 |
| ld4p | -8.61  | 279 | lws4 | -4.1   | 599 | 2zdl | -8.74  | 224 |
| ld4y | -15.16 | 199 | lws5 | -4.14  | 599 | 2zdm | -8.76  | 224 |
| ld6v | -8.43  | 433 | lwwj | -9.2   | 525 | 2zdn | -8.54  | 224 |
| ld6w | -8.14  | 279 | lx1z | -15.1  | 217 | 2zfp | -7.06  | 280 |
| ld7j | -4.51  | 108 | lx38 | -11.98 | 603 | 2zfs | -8.94  | 224 |
| ldb1 | -12.65 | 251 | lx39 | -12.6  | 603 | 2zft | -8.91  | 224 |
| ldet | -5.88  | 104 | lx8d | -3.02  | 209 | 2zhd | -8.94  | 224 |
| ldfo | -9.15  | 834 | lx8j | -9.51  | 687 | 2zif | -5.96  | 483 |
| ldhi | -9.92  | 319 | lx8r | -8.37  | 428 | 2zjw | -10.52 | 333 |
| ldhj | -8.95  | 319 | lx8t | -10.65 | 428 | 2zm3 | -8.49  | 301 |
| ldif | -14.56 | 199 | lx9d | -5.41  | 453 | 2zn7 | -10.77 | 298 |
| ldqx | -15.09 | 535 | lxa5 | -8.88  | 145 | 2zo3 | -13.66 | 278 |
| ldrj | -10.11 | 272 | lxap | -11.88 | 233 | 2zpk | -10.6  | 419 |
| ldrk | -9.32  | 272 | lxbo | -8.25  | 300 | 2zq1 | -9.05  | 224 |
| ldud | -6.59  | 409 | lxd0 | -9.73  | 496 | 2zq2 | -8.96  | 224 |
| ldy4 | -5.95  | 434 | lxff | -6.59  | 478 | 2zy1 | -10.11 | 280 |
| ldzk | -8.33  | 149 | lxgi | -6.63  | 359 | 2zym | -8.38  | 382 |
| le1x | -8.04  | 291 | lxgj | -8.2   | 352 | 2zz1 | -6.2   | 431 |
| le2k | -6.75  | 625 | lxh4 | -10.2  | 335 | 3a1t | -6.6   | 259 |
| le2l | -5.86  | 615 | lxh5 | -7.47  | 336 | 3a2o | -12.4  | 199 |
| le3v | -5.93  | 258 | lxh6 | -10    | 332 | 3a5y | -10.87 | 608 |
| le4h | -11.49 | 465 | lxhy | -8.44  | 519 | 3aaq | -4.51  | 350 |
| le5j | -5.46  | 303 | lxk5 | -8.2   | 205 | 3acw | -6.5   | 285 |
| lebw | -12.36 | 199 | lxka | -9.4   | 326 | 3acx | -7.78  | 285 |
| leby | -13.25 | 199 | lxkk | -11.64 | 290 | 3ads | -6.85  | 514 |
| lebz | -12.84 | 199 | lxow | -12.68 | 244 | 3adv | -4.14  | 520 |
| lec0 | -11.6  | 199 | lxr8 | -9.15  | 376 | 3ag9 | -10.99 | 318 |
| lec1 | -12.19 | 199 | lxr9 | -9.77  | 376 | 3agl | -10.65 | 339 |
| lec2 | -13.66 | 199 | lxzx | -13.96 | 250 | 3aid | -9.38  | 199 |
| lec3 | -12.34 | 199 | ly0l | -12.29 | 443 | 3b2q | -6.22  | 868 |
| lecv | -6.63  | 298 | ly1z | -4.21  | 283 | 3b3x | -4.92  | 511 |
| lefy | -11.23 | 351 | ly20 | -7.27  | 288 | 3b50 | -10.32 | 311 |
| legh | -7.78  | 911 | ly3n | -7.59  | 491 | 3b5j | -7.76  | 244 |
| leix | -15.1  | 463 | ly6q | -15.98 | 467 | 3b5r | -11.98 | 248 |
| lejn | -7.68  | 248 | ly6r | -13.82 | 467 | 3b65 | -12.66 | 248 |
| lela | -8.68  | 241 | lyc1 | -8.42  | 211 | 3b66 | -11.75 | 248 |
| lelb | -9.77  | 241 | lydk | -8.04  | 427 | 3b67 | -12.09 | 248 |
| lelc | -9.09  | 241 | lydr | -7.54  | 355 | 3b68 | -11.47 | 248 |
| leld | -9.15  | 241 | lyds | -8.09  | 355 | 3b7j | -7.06  | 906 |
| lele | -9.36  | 241 | lydt | -10    | 355 | 3b9g | -6.45  | 634 |
| lelr | -6.77  | 129 | lyon | -5.76  | 293 | 3bbb | -9.56  | 901 |
| lent | -9.51  | 331 | lyqj | -11.11 | 357 | 3bc3 | -9.3   | 215 |
| lerb | -11.06 | 175 | lyvm | -8.74  | 263 | 3bc4 | -7.3   | 199 |
| lez9 | -6.96  | 371 | lz1h | -11.47 | 195 | 3be9 | -10.41 | 328 |
| lezq | -12.36 | 286 | lz1r | -12.6  | 195 | 3bex | -7.61  | 497 |
| lf0r | -10.46 | 286 | lz3t | -5.38  | 431 | 3bfu | -8.57  | 525 |
| lf0t | -8.2   | 224 | lz3v | -5.62  | 431 | 3bgb | -8.26  | 199 |
| lf4e | -4.04  | 527 | lz6e | -13.28 | 287 | 3bgc | -6.85  | 199 |
| lf4f | -6.31  | 522 | lz6s | -5.92  | 125 | 3bgq | -10.87 | 273 |
| lf4g | -8.85  | 520 | lz71 | -12.54 | 277 | 3bgs | -12.87 | 859 |
| lf4x | -7.63  | 427 | lzc9 | -4.4   | 432 | 3bgz | -8.55  | 268 |
| lf5k | -5.12  | 248 | lzea | -7.13  | 426 | 3bra | -3.69  | 371 |

|      |        |     |      |        |     |      |        |     |
|------|--------|-----|------|--------|-----|------|--------|-----|
| 1f5l | -7.21  | 246 | 1zgi | -7.29  | 277 | 3brn | -11.88 | 154 |
| 1fao | -10.06 | 101 | 1zhy | -8.91  | 437 | 3bu1 | -11.13 | 145 |
| 1fch | -9.77  | 303 | 1zky | -8.54  | 479 | 3buh | -5     | 371 |
| 1fcy | -11.64 | 237 | 1zlv | -8.41  | 853 | 3bv9 | -7.32  | 289 |
| 1fcz | -12.6  | 236 | 1zog | -9.77  | 651 | 3bva | -8.91  | 199 |
| 1fd0 | -11.47 | 236 | 1zoh | -9.56  | 653 | 3bvb | -7.51  | 199 |
| 1fdq | -9.93  | 132 | 1zp8 | -11.98 | 199 | 3bwj | -8.87  | 339 |
| 1fh8 | -9.41  | 313 | 1zpa | -11.47 | 199 | 3bxo | -7.48  | 502 |
| 1fh9 | -8.79  | 313 | 1zsf | -13.55 | 197 | 3bxf | -7.57  | 499 |
| 1fhd | -9.32  | 313 | 1zsr | -13.42 | 197 | 3bxg | -6.77  | 501 |
| 1fj4 | -6.26  | 807 | 220l | -4.64  | 163 | 3bxh | -5.5   | 502 |
| 1fjs | -13.6  | 287 | 2a4m | -6.18  | 663 | 3bze | -8.2   | 374 |
| 1fkb | -13.25 | 108 | 2a5b | -5.37  | 497 | 3bzf | -6.18  | 374 |
| 1fkg | -10.93 | 108 | 2a5c | -6.31  | 493 | 3c1k | -12.9  | 277 |
| 1fki | -9.56  | 215 | 2a8g | -5.04  | 485 | 3c4h | -7.78  | 358 |
| 1fkn | -12.02 | 392 | 2aac | -3.04  | 327 | 3cf8 | -6.69  | 902 |
| 1fl3 | -9.28  | 423 | 2am4 | -5.08  | 343 | 3cfn | -6.83  | 461 |
| 1flr | -13.66 | 436 | 2aoc | -6.67  | 199 | 3cft | -5.73  | 463 |
| 1fm9 | -12.29 | 521 | 2aoe | -10.41 | 199 | 3cj2 | -6.63  | 558 |
| 1fpc | -9.56  | 275 | 2aog | -8.57  | 199 | 3cj4 | -8.89  | 559 |
| 1fq5 | -11.47 | 330 | 2aou | -10.56 | 287 | 3cj5 | -8.66  | 563 |
| 1fzk | -11.47 | 373 | 2aov | -9.62  | 289 | 3ckb | -4.07  | 505 |
| 1fzo | -10.77 | 373 | 2avm | -7.78  | 199 | 3ckp | -8.67  | 380 |
| 1fzq | -10.41 | 177 | 2avq | -5.99  | 199 | 3clp | -5.04  | 266 |
| 1g2k | -10.87 | 199 | 2avs | -10.34 | 199 | 3cow | -9.43  | 566 |
| 1g2o | -14.42 | 787 | 2avv | -12.65 | 199 | 3coy | -8.22  | 560 |
| 1g30 | -9.36  | 280 | 2ayr | -12.69 | 247 | 3coz | -7.61  | 567 |
| 1g32 | -8.34  | 280 | 2azr | -4.97  | 298 | 3ctt | -8.67  | 863 |
| 1g3d | -7.59  | 224 | 2b07 | -8.79  | 298 | 3cwk | -9.02  | 138 |
| 1g74 | -8.91  | 132 | 2b1v | -7.85  | 475 | 3cyw | -10.61 | 199 |
| 1g7g | -9.02  | 298 | 2b4l | -6.52  | 269 | 3cyx | -10.93 | 199 |
| 1g7q | -8.27  | 374 | 2b7d | -11.88 | 498 | 3d0b | -8.93  | 209 |
| 1g7v | -8.74  | 285 | 2baj | -11.47 | 338 | 3d0e | -11.47 | 645 |
| 1g85 | -7.49  | 315 | 2bal | -8.62  | 338 | 3d1e | -7.88  | 733 |
| 1g9r | -7.78  | 272 | 2bet | -3.78  | 315 | 3d1x | -11.83 | 199 |
| 1gaf | -10.93 | 435 | 2bfq | -9.41  | 192 | 3d1y | -11.23 | 199 |
| 1gai | -10.93 | 473 | 2bmk | -7.68  | 438 | 3d1z | -12.02 | 199 |
| 1gar | -13.66 | 400 | 2boh | -11.64 | 290 | 3d20 | -11.34 | 199 |
| 1gcz | -7.01  | 351 | 2boj | -7.88  | 457 | 3d6o | -5.62  | 125 |
| 1ghv | -5.94  | 287 | 2bok | -8.95  | 274 | 3d6p | -5.12  | 125 |
| 1ghw | -5.74  | 287 | 2bpy | -10.11 | 199 | 3d6q | -5.14  | 125 |
| 1gi1 | -7.47  | 224 | 2bq7 | -9.63  | 287 | 3d78 | -10.43 | 239 |
| 1gi7 | -6.16  | 246 | 2bqv | -10.99 | 199 | 3d7b | -5.04  | 125 |
| 1gj6 | -9.56  | 224 | 2br1 | -7.02  | 273 | 3d83 | -11.42 | 348 |
| 1gj7 | -10.77 | 247 | 2brb | -6.64  | 273 | 3d8z | -4.61  | 125 |
| 1gj8 | -9.51  | 259 | 2bt9 | -8.46  | 267 | 3da9 | -7.52  | 279 |
| 1gja | -7.4   | 259 | 2bvd | -8.2   | 277 | 3dhv | -4.04  | 499 |
| 1gjb | -8.67  | 247 | 2bvr | -5.05  | 280 | 3djk | -14.46 | 199 |
| 1gjc | -8.67  | 247 | 2bz6 | -9.69  | 308 | 3djo | -6     | 249 |
| 1gid | -7.13  | 259 | 2bza | -3.83  | 224 | 3djp | -5.74  | 249 |
| 1gni | -11.02 | 583 | 2c1p | -7.37  | 436 | 3djv | -6.22  | 249 |
| 1gnm | -8.54  | 199 | 2c3j | -8.44  | 258 | 3dix | -3.83  | 249 |
| 1gnn | -7.76  | 199 | 2c3l | -6.92  | 266 | 3dk1 | -13.31 | 199 |
| 1gno | -10.52 | 199 | 2c80 | -7.28  | 417 | 3dkf | -11.7  | 210 |
| 1gpk | -7.33  | 530 | 2c92 | -7.75  | 735 | 3dkg | -6.83  | 282 |
| 1gpn | -8.85  | 530 | 2c94 | -9.32  | 731 | 3dnd | -6.55  | 335 |
| 1gt1 | -8.2   | 315 | 2c97 | -8.39  | 734 | 3dne | -7.13  | 337 |
| 1gt3 | -8.82  | 316 | 2ca8 | -6.36  | 417 | 3dnj | -9.32  | 82  |

|      |        |     |      |        |     |      |        |     |
|------|--------|-----|------|--------|-----|------|--------|-----|
| lgt4 | -8.91  | 316 | 2cbj | -11.29 | 586 | 3dp9 | -13.23 | 460 |
| lgt5 | -8.33  | 316 | 2cbu | -7.76  | 441 | 3drf | -9.56  | 540 |
| lgvw | -9.51  | 329 | 2cbv | -7.49  | 444 | 3drg | -9.56  | 563 |
| lgvx | -9.87  | 329 | 2ce9 | -8.24  | 675 | 3dri | -6.04  | 560 |
| lgwv | -3.51  | 288 | 2cej | -11.77 | 199 | 3dsz | -10.61 | 173 |
| lgyx | -3.39  | 153 | 2cen | -11.34 | 199 | 3dvp | -6.83  | 171 |
| lgyy | -4.97  | 153 | 2ceq | -9.94  | 490 | 3dzt | -9.86  | 299 |
| lgz9 | -4.79  | 240 | 2ces | -9.91  | 441 | 3e3c | -7.68  | 237 |
| lgzc | -4.77  | 240 | 2cet | -10.95 | 436 | 3e5a | -11.24 | 298 |
| lh0a | -7.44  | 159 | 2cgf | -8.75  | 425 | 3e5u | -8     | 440 |
| lh1p | -6.72  | 555 | 2cgr | -9.94  | 434 | 3e6y | -7.65  | 467 |
| lh1s | -11.23 | 555 | 2cji | -11.23 | 287 | 3eb1 | -6.54  | 284 |
| lh22 | -12.43 | 530 | 2csn | -6.02  | 587 | 3ebl | -8.61  | 324 |
| lh23 | -11.4  | 529 | 2d0k | -6.86  | 160 | 3ed0 | -8.67  | 904 |
| lh2t | -10.77 | 851 | 2d3u | -9.45  | 559 | 3eeb | -8.04  | 206 |
| lh46 | -4.87  | 431 | 2d3z | -9.07  | 561 | 3efs | -7.29  | 252 |
| lh4w | -6.36  | 225 | 2drc | -13.5  | 319 | 3eko | -9.15  | 218 |
| lh5v | -5.37  | 302 | 2dri | -9.41  | 272 | 3ekr | -10.28 | 218 |
| lh6h | -7.24  | 144 | 2e2p | -6.48  | 596 | 3eks | -7.78  | 375 |
| lh9z | -7.4   | 584 | 2e2r | -11.28 | 457 | 3eqr | -11.88 | 271 |
| lha2 | -7.56  | 584 | 2e7f | -8.34  | 525 | 3ew2 | -9.11  | 236 |
| lhbv | -8.7   | 199 | 2er6 | -9.87  | 331 | 3eys | -7.54  | 434 |
| lhi4 | -6.14  | 136 | 2er9 | -10.11 | 331 | 3f3t | -6.26  | 262 |
| lhi5 | -5.51  | 136 | 2erz | -7.73  | 355 | 3f3u | -6.48  | 262 |
| lhii | -9.94  | 199 | 2euk | -9.02  | 205 | 3f68 | -6.91  | 277 |
| lhk4 | -7.25  | 583 | 2eum | -9.15  | 206 | 3f78 | -4.23  | 181 |
| lhmr | -8.95  | 132 | 2evl | -9.15  | 206 | 3f80 | -5.77  | 940 |
| lhms | -8.7   | 132 | 2ewa | -10.85 | 331 | 3f82 | -11.39 | 279 |
| lhn2 | -8.2   | 315 | 2exm | -5.61  | 299 | 3f8c | -10.49 | 207 |
| lhnn | -8.52  | 262 | 2flg | -10.3  | 221 | 3f8f | -9.05  | 226 |
| lhos | -11.68 | 199 | 2f34 | -9.41  | 252 | 3fat | -10.44 | 518 |
| lhp0 | -9.15  | 642 | 2f35 | -7.38  | 252 | 3ffg | -12.4  | 287 |
| lhpo | -12.6  | 199 | 2f5t | -7.06  | 467 | 3fj7 | -5.07  | 463 |
| lhps | -12.6  | 199 | 2f80 | -11.17 | 199 | 3fjg | -5.09  | 463 |
| lhpv | -12.6  | 199 | 2f8g | -11.88 | 199 | 3fjz | -5.53  | 428 |
| lhpx | -15.38 | 199 | 2fai | -8.53  | 476 | 3fk1 | -3.57  | 428 |
| lhqg | -4.1   | 940 | 2fdp | -10.36 | 374 | 3fl5 | -9.95  | 325 |
| lhsh | -12.87 | 199 | 2ffl | -11.21 | 631 | 3fqe | -11.34 | 270 |
| lhvi | -14.92 | 199 | 2fgi | -10.03 | 547 | 3fql | -9.77  | 561 |
| lhvj | -15.57 | 199 | 2fgu | -12.54 | 199 | 3fur | -10.93 | 257 |
| lhvk | -14.97 | 199 | 2fgv | -8.36  | 199 | 3fv3 | -13.01 | 340 |
| lhvl | -13.59 | 199 | 2fle | -10.73 | 199 | 3fvh | -8.67  | 234 |
| lhvr | -12.99 | 197 | 2flr | -8.33  | 502 | 3fwv | -7.7   | 129 |
| lhvs | -14.07 | 199 | 2fpz | -5.41  | 973 | 3g08 | -11.15 | 360 |
| lhwr | -11.38 | 199 | 2fqo | -8.79  | 309 | 3g0i | -4.92  | 771 |
| lhxb | -13.55 | 199 | 2fmt | -8.39  | 309 | 3g0w | -13.01 | 250 |
| lhxw | -14.79 | 199 | 2fqw | -9.12  | 317 | 3g19 | -9.11  | 85  |
| li00 | -8.66  | 557 | 2fqx | -9.77  | 317 | 3g2h | -5.22  | 807 |
| li5r | -11.64 | 571 | 2fgy | -8.97  | 317 | 3g2i | -6.64  | 810 |
| li7z | -8.74  | 440 | 2fr3 | -11.88 | 138 | 3g2j | -6.48  | 810 |
| li80 | -8.75  | 792 | 2fvd | -11.64 | 285 | 3g2k | -6.55  | 810 |
| li8i | -10.46 | 226 | 2fxs | -8.28  | 214 | 3g2l | -5.28  | 810 |
| licj | -3.04  | 505 | 2fxu | -11.14 | 361 | 3g2n | -5.59  | 816 |
| ligj | -13.66 | 867 | 2fxv | -7.3   | 381 | 3g30 | -3.43  | 263 |
| lii5 | -9.04  | 443 | 2g5u | -11.6  | 455 | 3g31 | -3.94  | 263 |
| liih | -3.94  | 499 | 2g70 | -10.61 | 262 | 3g34 | -4.04  | 263 |
| liiq | -10.22 | 199 | 2g71 | -10.18 | 262 | 3g35 | -6.39  | 260 |
| lik4 | -10.12 | 911 | 2g72 | -8.88  | 265 | 3g3r | -8.85  | 287 |

|       |        |     |      |        |     |      |        |     |
|-------|--------|-----|------|--------|-----|------|--------|-----|
| lis0  | -9.56  | 103 | 2g78 | -9.45  | 138 | 3g5d | -10.87 | 257 |
| lizh  | -10.52 | 199 | 2g79 | -9.45  | 138 | 3g90 | -8.68  | 346 |
| lj01  | -8.84  | 313 | 2g8r | -5.45  | 125 | 3g9l | -8.37  | 337 |
| lj14  | -6.14  | 224 | 2g94 | -13.01 | 390 | 3ga5 | -7.51  | 306 |
| lj16  | -5.25  | 224 | 2gek | -10.28 | 362 | 3gba | -12.39 | 258 |
| lj17  | -7.13  | 224 | 2gfd | -8.58  | 433 | 3gbb | -9.42  | 256 |
| lj4r  | -10.55 | 108 | 2gj5 | -11.37 | 162 | 3gbe | -6.83  | 559 |
| ljak  | -7.61  | 500 | 2gl0 | -6.59  | 977 | 3gcp | -10.69 | 338 |
| ljet  | -9.91  | 518 | 2glp | -6.85  | 906 | 3gcq | -8.83  | 338 |
| ljeu  | -9.32  | 518 | 2gss | -6.75  | 417 | 3gcs | -9.91  | 332 |
| ljev  | -9.41  | 518 | 2gst | -8.29  | 435 | 3gcu | -9.26  | 677 |
| ljfh  | -2.79  | 496 | 2gv7 | -10.73 | 242 | 3gcv | -9.74  | 339 |
| ljgl  | -11.88 | 420 | 2gvj | -13.01 | 926 | 3ggt | -11.52 | 199 |
| ljlr  | -4.55  | 941 | 2gvv | -5.33  | 310 | 3ggv | -13.35 | 199 |
| ljmf  | -7.88  | 633 | 2gz2 | -7.13  | 719 | 3gi4 | -14.75 | 199 |
| ljmg  | -8.29  | 633 | 2h4g | -8.91  | 298 | 3gi5 | -15.33 | 199 |
| ljmi  | -8.28  | 643 | 2h4k | -7.51  | 298 | 3gi6 | -15.33 | 199 |
| ljqd  | -7.05  | 287 | 2hb1 | -5.19  | 298 | 3gjw | -11.34 | 351 |
| ljqe  | -8.8   | 281 | 2hb3 | -15.5  | 199 | 3gk1 | -5.6   | 177 |
| ljqy  | -6.72  | 516 | 2hhn | -10.24 | 218 | 3gkz | -10.93 | 234 |
| ljsv  | -7.78  | 289 | 2hjb | -6     | 947 | 3gm0 | -10.61 | 238 |
| ljwt  | -10.73 | 300 | 2hkf | -8.71  | 430 | 3gnw | -12.43 | 561 |
| ljqy  | -11.88 | 193 | 2hr6 | -6.59  | 412 | 3gpo | -7.24  | 159 |
| ljys  | -4.81  | 453 | 2hrm | -4.86  | 412 | 3gqz | -2.97  | 359 |
| lkl1  | -8.99  | 224 | 2hs1 | -11.59 | 199 | 3gr2 | -3.45  | 359 |
| lklj  | -10.32 | 224 | 2hs2 | -11.35 | 199 | 3gs6 | -9     | 323 |
| lkl1  | -9.43  | 224 | 2hw2 | -4.06  | 139 | 3gsg | -3.69  | 359 |
| lklm  | -10.11 | 224 | 2hxm | -7.13  | 224 | 3gsm | -8.85  | 325 |
| lkl1n | -9.31  | 224 | 2hzi | -8.97  | 672 | 3gss | -7.96  | 417 |
| lkl1y | -4.4   | 637 | 2hzy | -10.09 | 835 | 3gst | -9.18  | 435 |
| lk21  | -11.44 | 277 | 2i0a | -15.57 | 199 | 3gtc | -3.21  | 359 |
| lk22  | -11.47 | 281 | 2i0g | -13.28 | 444 | 3gus | -8.26  | 418 |
| lk27  | -12.29 | 811 | 2i4d | -15.95 | 199 | 3gv9 | -2.9   | 359 |
| lkav  | -7.96  | 298 | 2i4j | -8.42  | 541 | 3gvb | -3.53  | 359 |
| lkdk  | -12.36 | 355 | 2i4u | -15.8  | 199 | 3gx0 | -4.76  | 409 |
| lkel  | -9.95  | 436 | 2i4v | -15.3  | 199 | 3gy2 | -7.85  | 224 |
| lkpm  | -7.92  | 122 | 2i4w | -15.83 | 199 | 3gy4 | -6.96  | 224 |
| lkv1  | -8.11  | 332 | 2i4z | -7.79  | 541 | 3gy7 | -6.18  | 224 |
| lkv5  | -5.77  | 499 | 2i80 | -7.37  | 693 | 3h30 | -6.19  | 334 |
| lkyv  | -8.09  | 743 | 2idw | -12.14 | 199 | 3h5b | -13.67 | 199 |
| lkzk  | -14.19 | 199 | 2ieo | -11.6  | 199 | 3h78 | -5.8   | 666 |
| lkzn  | -12.19 | 187 | 2ihj | -6.27  | 379 | 3h89 | -10.43 | 216 |
| ll2s  | -6.26  | 356 | 2ihq | -11.6  | 249 | 3h8b | -8.59  | 216 |
| ll83  | -4.64  | 163 | 2imd | -11.34 | 395 | 3h8c | -10.55 | 215 |
| llaf  | -10.73 | 239 | 2itk | -10.51 | 146 | 3hb4 | -12.36 | 569 |
| llag  | -8.61  | 239 | 2iuz | -7.59  | 396 | 3hcm | -4.51  | 182 |
| llah  | -10.28 | 239 | 2ivu | -8.78  | 552 | 3hec | -6.1   | 330 |
| llbf  | -10.73 | 248 | 2iwx | -9.12  | 215 | 3heg | -9.21  | 334 |
| llbk  | -4.34  | 417 | 2iyf | -5.12  | 385 | 3hek | -11.29 | 444 |
| llce  | -10.58 | 332 | 2izl | -8.2   | 487 | 3hit | -11.19 | 258 |
| llf2  | -10.28 | 330 | 2j27 | -4.81  | 499 | 3hjo | -8.91  | 419 |
| lli2  | -5.52  | 163 | 2j2u | -10.01 | 282 | 3hkw | -11.8  | 562 |
| lli3  | -5.81  | 163 | 2j34 | -10.69 | 287 | 3hky | -9.69  | 565 |
| lli6  | -5.19  | 163 | 2j47 | -7.39  | 573 | 3hl7 | -10.43 | 337 |
| llke  | -10.27 | 158 | 2j4g | -9.02  | 587 | 3hll | -11.25 | 338 |
| llkk  | -9.36  | 106 | 2j62 | -15.49 | 586 | 3hmo | -10.27 | 258 |
| llkl  | -7.94  | 105 | 2j75 | -9.08  | 439 | 3hrf | -6.81  | 285 |
| llol  | -8.72  | 206 | 2j77 | -6.68  | 437 | 3hub | -11.05 | 336 |

|      |        |     |      |        |     |      |        |     |
|------|--------|-----|------|--------|-----|------|--------|-----|
| lloq | -5.05  | 417 | 2j78 | -8.76  | 444 | 3huc | -8.18  | 338 |
| llor | -15.1  | 419 | 2j79 | -8.14  | 438 | 3hv7 | -10.82 | 331 |
| llpg | -9.68  | 235 | 2j7b | -9.04  | 438 | 3hv8 | -9.54  | 243 |
| llpz | -10.38 | 235 | 2j7d | -9.74  | 438 | 3hx3 | -10.93 | 246 |
| llyb | -15.6  | 677 | 2j7e | -10    | 437 | 3hxi | -8.64  | 197 |
| llyx | -6.2   | 493 | 2j7f | -8.68  | 436 | 3i25 | -11.62 | 374 |
| lm0b | -12.04 | 199 | 2j7g | -9.56  | 438 | 3i4b | -11.14 | 707 |
| lm13 | -10.34 | 274 | 2j7h | -9.82  | 439 | 3i6o | -14.13 | 199 |
| lm2p | -8.34  | 326 | 2j94 | -8.57  | 287 | 3i73 | -7.5   | 513 |
| lm2q | -8.33  | 328 | 2j95 | -11.47 | 287 | 3i7e | -14.83 | 199 |
| lm2r | -8.82  | 328 | 2jdh | -8.89  | 457 | 3ie3 | -9.12  | 418 |
| lm4h | -13.01 | 392 | 2jdk | -8.93  | 457 | 3ies | -13.55 | 432 |
| lm6p | -6.96  | 293 | 2jdm | -7.38  | 457 | 3ifl | -11.03 | 433 |
| lm7d | -8.51  | 436 | 2jdn | -7.59  | 457 | 3ifo | -9.92  | 435 |
| lm7i | -7.37  | 436 | 2jdp | -9.02  | 457 | 3ilq | -7.11  | 361 |
| lm7y | -14.97 | 849 | 2jds | -11.2  | 355 | 3imc | -4.04  | 563 |
| lmes | -10.52 | 199 | 2jdu | -9.18  | 457 | 3ime | -4.1   | 556 |
| lmfa | -6.89  | 231 | 2jdv | -11.2  | 355 | 3iob | -4.67  | 563 |
| lmh5 | -12.59 | 370 | 2jdy | -5.97  | 457 | 3ioc | -5.02  | 548 |
| lmhw | -10.04 | 215 | 2jf4 | -11.14 | 487 | 3iod | -5.6   | 549 |
| lmjj | -11.94 | 429 | 2jfh | -4.18  | 431 | 3ioe | -4.46  | 567 |
| lmoq | -4.72  | 733 | 2jfb | -7.15  | 505 | 3ioi | -8.57  | 549 |
| lmq5 | -12.29 | 285 | 2jg0 | -10.69 | 508 | 3iok | -10.87 | 286 |
| lmq6 | -15.24 | 285 | 2jh0 | -11.88 | 280 | 3ip8 | -3.12  | 233 |
| lmrx | -9.92  | 199 | 2jh5 | -8.79  | 279 | 3ipq | -10.34 | 471 |
| lmsm | -14.32 | 199 | 2jh6 | -10.61 | 280 | 3ipu | -10    | 504 |
| lmsn | -12.42 | 199 | 2jiw | -6.26  | 591 | 3iqh | -6.27  | 310 |
| lmtr | -11.47 | 195 | 2jj3 | -13.05 | 452 | 3iqi | -6.03  | 310 |
| lmu8 | -12.29 | 277 | 2jkh | -10.99 | 289 | 3isj | -5.02  | 288 |
| ln1t | -5.26  | 629 | 2jkp | -5.78  | 688 | 3iss | -8.26  | 419 |
| ln3i | -12.14 | 787 | 2jxr | -9.62  | 330 | 3iub | -6.2   | 565 |
| ln46 | -14.37 | 488 | 2nmy | -11.43 | 199 | 3iue | -7.96  | 567 |
| ln4h | -8.95  | 245 | 2nmz | -11.43 | 199 | 3ivc | -5.63  | 576 |
| ln4k | -13.72 | 293 | 2nn8 | -4.9   | 139 | 3ivg | -5.88  | 563 |
| lncl | -8.37  | 467 | 2nnd | -8.28  | 149 | 3ivx | -7.85  | 564 |
| lncl | -8.37  | 467 | 2nnd | -8.28  | 149 | 3ivx | -7.85  | 564 |
| lncl | -8.37  | 467 | 2nnd | -8.28  | 149 | 3ivx | -7.85  | 564 |
| ln3  | -6.83  | 466 | 2nnp | -11.43 | 199 | 3iw5 | -8.3   | 337 |
| lnf8 | -10.69 | 415 | 2nt7 | -8.91  | 298 | 3iw6 | -7.49  | 338 |
| lnfu | -10.58 | 287 | 2nta | -6.55  | 298 | 3iw7 | -7.7   | 336 |
| lnfx | -11.64 | 288 | 2o0u | -7.51  | 332 | 3iw8 | -6.66  | 335 |
| lnfy | -12.14 | 288 | 2o1c | -6.45  | 148 | 3jdw | -4.91  | 721 |
| lnh0 | -13.31 | 199 | 2o2u | -8.74  | 320 | 3jrs | -5.85  | 175 |
| lnhu | -7.73  | 559 | 2o4j | -13.79 | 241 | 3jrx | -12.29 | 497 |
| lnja | -8.62  | 643 | 2o4k | -14.28 | 199 | 3juo | -6.92  | 314 |
| lnjc | -7.59  | 643 | 2o4n | -10.69 | 199 | 3jup | -7.62  | 315 |
| lnjd | -7.61  | 633 | 2o4p | -14.65 | 199 | 3jvk | -5.37  | 129 |
| lnje | -5.19  | 633 | 2o4r | -12.84 | 241 | 3jvr | -7.82  | 259 |
| lnjs | -10.69 | 201 | 2o4s | -14.35 | 199 | 3jvs | -8.93  | 257 |
| lnl9 | -8.14  | 284 | 2ogy | -6.12  | 525 | 3jy9 | -12.29 | 283 |
| lnli | -4.9   | 249 | 2ojg | -7.7   | 338 | 3jyj | -7.85  | 114 |
| lnm6 | -13.72 | 277 | 2ojj | -11.88 | 345 | 3jyr | -7.56  | 371 |
| lnny | -10.46 | 284 | 2ok1 | -8.55  | 334 | 3jzg | -5.42  | 360 |
| lno6 | -6.02  | 284 | 2olb | -7.56  | 518 | 3jzj | -4.93  | 389 |
| lnq7 | -9.28  | 245 | 2on6 | -9.24  | 847 | 3k00 | -7.88  | 389 |
| lnu3 | -5.46  | 285 | 2oxd | -9.32  | 326 | 3k02 | -6.83  | 389 |
| lnvr | -11.08 | 265 | 2oxn | -10.17 | 334 | 3k4q | -7.29  | 439 |
| lnvs | -10.69 | 265 | 2oxx | -9.15  | 326 | 3k5v | -8.61  | 287 |
| lnw5 | -7.12  | 271 | 2oxy | -8.91  | 328 | 3k8o | -15.12 | 851 |
| lnz7 | -9.72  | 284 | 2oyk | -7.24  | 435 | 3k8q | -15.41 | 859 |

|      |        |     |      |        |     |      |        |     |
|------|--------|-----|------|--------|-----|------|--------|-----|
| lo0f | -7.24  | 125 | 2oyl | -8.61  | 435 | 3k97 | -10.93 | 211 |
| lo0h | -8.09  | 125 | 2oym | -6.83  | 435 | 3k99 | -9.87  | 219 |
| lo0m | -7.03  | 125 | 2p15 | -14.07 | 485 | 3kdb | -13.46 | 199 |
| lo0n | -5.58  | 125 | 2p2a | -8.37  | 514 | 3kdc | -12.68 | 199 |
| lo2h | -9.79  | 224 | 2p3a | -10.87 | 197 | 3kdm | -9.56  | 439 |
| lo2j | -9.45  | 224 | 2p3b | -11.59 | 198 | 3kgp | -3.51  | 240 |
| lo2n | -8.32  | 224 | 2p3i | -4.76  | 162 | 3kgt | -7.52  | 457 |
| lo2o | -8.68  | 224 | 2p4j | -12.24 | 390 | 3kgu | -8.09  | 461 |
| lo2q | -10.49 | 224 | 2p4y | -12.29 | 472 | 3kjd | -11.66 | 351 |
| lo2s | -7.47  | 224 | 2p7a | -8.34  | 224 | 3kku | -7.78  | 216 |
| lo2w | -8     | 224 | 2p7g | -8.92  | 223 | 3kmx | -6.59  | 785 |
| lo2z | -8.34  | 224 | 2p7z | -8.99  | 208 | 3kmy | -6.14  | 785 |
| lo33 | -7.85  | 224 | 2p95 | -12.79 | 287 | 3kqb | -12.71 | 287 |
| lo3d | -9.74  | 224 | 2pbw | -11.28 | 502 | 3kqc | -11.83 | 287 |
| lo3f | -10.87 | 224 | 2pfy | -8.91  | 296 | 3kqe | -11.05 | 287 |
| lo3h | -9.97  | 224 | 2pk5 | -14.61 | 199 | 3kv2 | -8.59  | 940 |
| lo3i | -9.97  | 224 | 2pk6 | -14.87 | 199 | 3kyg | -10.2  | 455 |
| lo3j | -9.25  | 224 | 2pmk | -8.09  | 244 | 3kyq | -5.77  | 194 |
| lo3k | -9.25  | 224 | 2pog | -13.03 | 445 | 3kze | -5.4   | 274 |
| lo3p | -9.09  | 247 | 2pq9 | -11.08 | 428 | 3l1n | -7.69  | 153 |
| lo5a | -8.77  | 247 | 2pqb | -9.84  | 446 | 3l4u | -10.28 | 865 |
| lo5b | -7.88  | 246 | 2pqc | -7.85  | 446 | 3l4v | -9.18  | 864 |
| lo5c | -7.13  | 247 | 2pqz | -7.74  | 199 | 3l4w | -8.2   | 864 |
| lo5g | -6.77  | 284 | 2psj | -10.52 | 307 | 3l4x | -9.41  | 864 |
| lo7o | -6.14  | 288 | 2psu | -10.41 | 199 | 3l4y | -9.56  | 864 |
| lo8b | -3.66  | 370 | 2pu2 | -6.05  | 359 | 3l4z | -9.18  | 864 |
| lo9d | -7.65  | 465 | 2pv1 | -9.75  | 104 | 3l59 | -5.05  | 391 |
| loar | -10.11 | 231 | 2pvh | -9     | 328 | 3l5b | -5.34  | 388 |
| loba | -3.34  | 339 | 2pvj | -11.06 | 327 | 3l6h | -7.37  | 255 |
| locq | -7.09  | 301 | 2pvl | -10.41 | 328 | 3l8s | -9.57  | 335 |
| lod8 | -6.96  | 303 | 2pvm | -8.8   | 328 | 3lbl | -10.17 | 95  |
| lody | -11.06 | 199 | 2pwc | -8.97  | 199 | 3lbz | -5.27  | 245 |
| loe8 | -7.54  | 410 | 2pwd | -6.01  | 558 | 3lc3 | -7.14  | 293 |
| lofz | -6.31  | 625 | 2pwg | -6.59  | 557 | 3lcu | -4.81  | 258 |
| logg | -7.09  | 995 | 2pym | -9.32  | 199 | 3lcv | -6.48  | 257 |
| logx | -8.32  | 253 | 2pyn | -10.34 | 199 | 3le8 | -8.29  | 565 |
| logz | -8     | 251 | 2q54 | -12.31 | 199 | 3lf0 | -7.81  | 313 |
| lohr | -11.88 | 199 | 2q55 | -11.87 | 199 | 3lgs | -6.29  | 492 |
| loif | -10.55 | 445 | 2q5k | -15.44 | 199 | 3liw | -10.38 | 286 |
| loko | -6.2   | 485 | 2q6f | -7.44  | 590 | 3ljo | -9.05  | 224 |
| lom1 | -9.25  | 326 | 2q88 | -7.92  | 258 | 3lk1 | -5.82  | 177 |
| lony | -9.25  | 284 | 2q89 | -8.61  | 258 | 3lp7 | -7.44  | 940 |
| lonz | -6.96  | 284 | 2q8h | -4.1   | 731 | 3lpi | -11.64 | 780 |
| los5 | -9.36  | 564 | 2q8z | -7.76  | 652 | 3lpk | -12.43 | 780 |
| low4 | -7.76  | 240 | 2qbp | -11.47 | 298 | 3lxo | -6.59  | 125 |
| lowe | -8.47  | 246 | 2qbp | -10.17 | 298 | 3lzu | -13.74 | 199 |
| lowh | -10.11 | 246 | 2qbr | -8.64  | 299 | 3lzv | -14.46 | 199 |
| loxr | -7.09  | 120 | 2qbs | -9.12  | 298 | 3lzz | -5.24  | 323 |
| loyt | -9.9   | 278 | 2qbu | -8.46  | 457 | 3m36 | -13.42 | 287 |
| lp19 | -5.62  | 372 | 2qbw | -9.91  | 190 | 3m37 | -12.35 | 287 |
| lp1n | -9.28  | 517 | 2qci | -11.39 | 199 | 3m89 | -8.42  | 385 |
| lp1o | -7.87  | 521 | 2qd6 | -11.85 | 199 | 3m8u | -6.68  | 509 |
| lpb8 | -7.04  | 283 | 2qd7 | -12.43 | 199 | 3mfv | -3.45  | 940 |
| lpb9 | -4.94  | 282 | 2qd8 | -12.39 | 199 | 3mfw | -4.81  | 946 |
| lpbq | -8.56  | 541 | 2qe4 | -10.87 | 412 | 3mhw | -3.14  | 247 |
| lpdz | -5.05  | 867 | 2qfo | -6.42  | 208 | 3mi2 | -10.61 | 513 |
| lpgp | -7.78  | 947 | 2qft | -7.18  | 428 | 3miy | -10.49 | 240 |
| lpme | -12.84 | 334 | 2qfu | -5.71  | 428 | 3mj1 | -10.69 | 229 |



|      |        |     |      |        |     |      |        |     |
|------|--------|-----|------|--------|-----|------|--------|-----|
| lpot | -7.51  | 323 | 2qg0 | -7.82  | 415 | 3moe | -5.88  | 619 |
| lpph | -8.09  | 224 | 2qg2 | -7.37  | 208 | 3mof | -4.19  | 625 |
| lppi | -6.85  | 497 | 2qhd | -7.34  | 245 | 3moh | -3.87  | 605 |
| lppk | -10.46 | 324 | 2qhm | -8.44  | 269 | 3ms9 | -7.13  | 266 |
| lppl | -11.68 | 324 | 2qhz | -9.94  | 199 | 3mss | -6.36  | 265 |
| lppm | -7.92  | 324 | 2qi0 | -10.08 | 199 | 3mxd | -12.07 | 199 |
| lpro | -15.44 | 199 | 2qi1 | -9.97  | 199 | 3mxe | -13.68 | 199 |
| lpu7 | -4.23  | 215 | 2qi3 | -13.93 | 199 | 3mxf | -9.99  | 128 |
| lpu8 | -4.23  | 216 | 2qi5 | -14.83 | 199 | 3n3g | -9.89  | 218 |
| lpxn | -9.77  | 295 | 2qm7 | -8.04  | 626 | 3n7o | -9.76  | 224 |
| lpxo | -11.88 | 297 | 2qm9 | -10.61 | 272 | 3nee | -7.29  | 463 |
| lpxp | -9.09  | 295 | 2qmg | -12.51 | 391 | 3neo | -8.09  | 461 |
| lpye | -8.76  | 267 | 2qmj | -5.75  | 864 | 3nes | -7.68  | 463 |
| lpyn | -7.51  | 284 | 2qnn | -9.77  | 199 | 3nex | -8.2   | 465 |
| lpzi | -5.77  | 516 | 2qnp | -8.75  | 199 | 3nhi | -11.52 | 296 |
| lpzo | -4.53  | 264 | 2qnq | -8.35  | 199 | 3nht | -9.57  | 296 |
| lpzp | -4.52  | 264 | 2qpu | -4.92  | 405 | 3nkx | -7     | 458 |
| lq5k | -10.14 | 690 | 2qrk | -5.82  | 366 | 3npc | -11.39 | 358 |
| lq72 | -9.36  | 439 | 2qrl | -5.46  | 372 | 3nq3 | -5.16  | 163 |
| lq7a | -9.83  | 122 | 2qry | -11.8  | 305 | 3nq9 | -5.51  | 163 |
| lq8t | -6.5   | 359 | 2qt5 | -6.87  | 195 | 3nu3 | -13.42 | 199 |
| lq8u | -8.14  | 362 | 2qtg | -6.94  | 492 | 3nu4 | -12.05 | 199 |
| lq8w | -7.16  | 355 | 2qtt | -5.9   | 494 | 3nu5 | -11.4  | 199 |
| lqan | -6.12  | 237 | 2qu6 | -11.64 | 284 | 3nu6 | -12.71 | 199 |
| lqaw | -7     | 750 | 2qw1 | -5.33  | 306 | 3nu9 | -12.36 | 199 |
| lqb1 | -9.25  | 224 | 2r0h | -4.79  | 637 | 3nuj | -12.82 | 199 |
| lqb6 | -8.28  | 224 | 2r2w | -6.1   | 248 | 3o6m | -10.22 | 435 |
| lqbn | -8     | 224 | 2r38 | -10.17 | 199 | 3o84 | -9.89  | 434 |
| lqbo | -10.58 | 224 | 2r3t | -8     | 199 | 3obu | -5.88  | 143 |
| lqbr | -14.44 | 199 | 2r3w | -9.42  | 199 | 3odu | -11.11 | 761 |
| lqbs | -12.93 | 197 | 2r58 | -2.73  | 213 | 3ok9 | -15.34 | 199 |
| lqbu | -13.98 | 199 | 2r5a | -3.55  | 213 | 3oka | -6.45  | 390 |
| lqbv | -7.36  | 276 | 2r5p | -11.59 | 199 | 3okc | -6.06  | 379 |
| lqca | -7.2   | 634 | 2r6w | -12.78 | 453 | 3okp | -6.45  | 379 |
| lqft | -11.98 | 176 | 2r6y | -12.97 | 454 | 3oy8 | -5     | 263 |
| lqhc | -10.34 | 125 | 2r9w | -6.96  | 359 | 3oyw | -5.61  | 263 |
| lqi0 | -3.21  | 303 | 2ra0 | -10.65 | 286 | 3p2e | -8.5   | 202 |
| lqiw | -10.58 | 289 | 2rcb | -9.27  | 283 | 3p5o | -9.97  | 128 |
| lqka | -8.09  | 518 | 2reg | -7.7   | 291 | 3p8p | -6.22  | 276 |
| lqkb | -10.04 | 518 | 2rin | -5.46  | 289 | 3pb3 | -8.5   | 200 |
| lqkt | -12.34 | 249 | 2rk7 | -5.53  | 611 | 3pd2 | -7.47  | 291 |
| lql7 | -6.83  | 224 | 2rk8 | -4.97  | 623 | 3pd3 | -6.07  | 289 |
| lql9 | -7.31  | 224 | 2rka | -4.1   | 612 | 3pd4 | -6.12  | 290 |
| lqxk | -6.89  | 284 | 2rkd | -3.72  | 614 | 3pd9 | -8.5   | 519 |
| lqy1 | -8.91  | 158 | 2rke | -5.58  | 613 | 3std | -15.18 | 487 |
| lqy2 | -7.85  | 158 | 2rkf | -12.4  | 199 | 4er1 | -9.04  | 331 |
| lqy5 | -9.15  | 226 | 2rkm | -5.33  | 518 | 4er2 | -12.71 | 331 |
| lr4w | -5.53  | 443 | 2sim | -4.67  | 382 | 4rsk | -5.91  | 125 |
| lr6n | -10.11 | 197 | 2std | -13.46 | 487 | 4std | -14.11 | 493 |
| lr9l | -7.37  | 310 | 2tpi | -5.89  | 278 | 4tim | -2.95  | 499 |
| lrbp | -9.18  | 176 | 2uwl | -11.47 | 287 | 4ts1 | -6.74  | 629 |
| lrd4 | -10.57 | 185 | 2uwo | -11.88 | 285 | 5er1 | -8.22  | 331 |
| lrdt | -9.15  | 465 | 2uxi | -9.97  | 412 | 5er2 | -8.97  | 331 |
| lre8 | -13.01 | 338 | 2uxu | -6.48  | 412 | 5std | -14.34 | 493 |
| lrej | -11.34 | 334 | 2uy0 | -9.45  | 199 | 5tmp | -10.2  | 211 |
| lrek | -9.15  | 337 | 2uy3 | -4.4   | 286 | 5yas | -4.45  | 257 |
| lrnt | -7.09  | 105 | 2uy4 | -6.39  | 285 | 6rnt | -3.23  | 105 |
| lro7 | -4.35  | 965 | 2uy5 | -7.51  | 287 | 6std | -11.8  | 493 |

|      |        |     |      |       |     |      |        |     |
|------|--------|-----|------|-------|-----|------|--------|-----|
| 1rr6 | -14    | 847 | 2v00 | -5    | 331 | 7std | -14.65 | 493 |
| 1s5z | -4.38  | 901 | 2v2c | -4.66 | 499 | 8a3h | -5.54  | 301 |
| 1s89 | -7.15  | 913 | 2v2h | -5.15 | 724 |      |        |     |
| 1sdt | -12.66 | 199 | 2v3d | -5.38 | 497 |      |        |     |
| 1sdu | -13.75 | 199 | 2v3u | -4.1  | 254 |      |        |     |

<sup>a</sup>Experimental binding free energy estimated from  $\Delta G_{\text{bind}}=RT\ln 1/K_i$  or  $\Delta G_{\text{bind}}=RT\ln 1/K_d$ .  $T$  was set to 300 K.

**Table S2.** Overall accuracy of MM/GBSA results based on various calculation protocols.

| $\epsilon_{\text{in}}$                                                                                                              | ff02        | ff03        | ff14SB      | ff99        | ff99SB      | ff99SBildn  |
|-------------------------------------------------------------------------------------------------------------------------------------|-------------|-------------|-------------|-------------|-------------|-------------|
| <b>Enthalpies based on minimized structures (enthalpy<sub>min</sub>)</b>                                                            |             |             |             |             |             |             |
| 1                                                                                                                                   | 0.343±0.002 | 0.379±0.002 | 0.339±0.002 | 0.336±0.002 | 0.339±0.002 | 0.335±0.003 |
| 1.5                                                                                                                                 | 0.477±0.002 | 0.502±0.002 | 0.477±0.003 | 0.474±0.002 | 0.477±0.002 | 0.474±0.002 |
| 2                                                                                                                                   | 0.534±0.002 | 0.551±0.003 | 0.536±0.002 | 0.533±0.002 | 0.536±0.002 | 0.533±0.002 |
| 2.5                                                                                                                                 | 0.561±0.002 | 0.573±0.002 | 0.563±0.002 | 0.560±0.004 | 0.562±0.002 | 0.561±0.002 |
| 3                                                                                                                                   | 0.574±0.002 | 0.583±0.002 | 0.576±0.002 | 0.574±0.002 | 0.576±0.002 | 0.574±0.002 |
| 3.5                                                                                                                                 | 0.582±0.003 | 0.589±0.002 | 0.584±0.002 | 0.581±0.003 | 0.583±0.002 | 0.582±0.002 |
| 4                                                                                                                                   | 0.586±0.002 | 0.593±0.002 | 0.588±0.002 | 0.586±0.002 | 0.588±0.002 | 0.587±0.002 |
| <b>Enthalpies based on MD trajectories (enthalpy<sub>md</sub>)</b>                                                                  |             |             |             |             |             |             |
| 1                                                                                                                                   | 0.327±0.002 | 0.362±0.002 | 0.325±0.002 | 0.318±0.003 | 0.342±0.002 | 0.318±0.002 |
| 1.5                                                                                                                                 | 0.449±0.003 | 0.478±0.002 | 0.455±0.002 | 0.447±0.002 | 0.465±0.003 | 0.447±0.002 |
| 2                                                                                                                                   | 0.504±0.002 | 0.526±0.004 | 0.513±0.002 | 0.505±0.004 | 0.519±0.002 | 0.505±0.002 |
| 2.5                                                                                                                                 | 0.531±0.002 | 0.549±0.002 | 0.541±0.002 | 0.533±0.002 | 0.545±0.002 | 0.533±0.002 |
| 3                                                                                                                                   | 0.545±0.002 | 0.560±0.002 | 0.555±0.003 | 0.548±0.002 | 0.558±0.002 | 0.548±0.002 |
| 3.5                                                                                                                                 | 0.553±0.002 | 0.567±0.002 | 0.564±0.003 | 0.556±0.002 | 0.565±0.003 | 0.557±0.002 |
| 4                                                                                                                                   | 0.558±0.002 | 0.571±0.002 | 0.569±0.002 | 0.561±0.002 | 0.570±0.002 | 0.562±0.003 |
| <b>Binding free energies based on 9Å-truncated NMEs of the minimized structures (<math>\Delta G_{\text{nmode\_min\_9Å}}</math>)</b> |             |             |             |             |             |             |
| 1                                                                                                                                   | 0.323±0.002 | 0.375±0.002 | 0.327±0.002 | 0.323±0.002 | 0.324±0.003 | 0.321±0.002 |
| 1.5                                                                                                                                 | 0.468±0.002 | 0.507±0.002 | 0.478±0.002 | 0.472±0.002 | 0.470±0.002 | 0.469±0.002 |
| 2                                                                                                                                   | 0.528±0.002 | 0.555±0.003 | 0.538±0.002 | 0.532±0.002 | 0.527±0.002 | 0.527±0.004 |
| 2.5                                                                                                                                 | 0.552±0.002 | 0.573±0.002 | 0.562±0.004 | 0.556±0.002 | 0.551±0.002 | 0.551±0.002 |
| 3                                                                                                                                   | 0.563±0.002 | 0.582±0.002 | 0.573±0.003 | 0.567±0.002 | 0.561±0.002 | 0.562±0.002 |
| 3.5                                                                                                                                 | 0.568±0.002 | 0.585±0.002 | 0.578±0.002 | 0.573±0.002 | 0.567±0.002 | 0.567±0.002 |
| 4                                                                                                                                   | 0.571±0.002 | 0.587±0.002 | 0.581±0.002 | 0.575±0.004 | 0.569±0.002 | 0.569±0.002 |
| <b>Binding free energies based on IEs of the MD trajectories (<math>\Delta G_{\text{interaction\_entropy}}</math>)</b>              |             |             |             |             |             |             |
| 1                                                                                                                                   | 0.404±0.002 | 0.407±0.003 | 0.394±0.002 | 0.400±0.002 | 0.401±0.002 | 0.389±0.002 |
| 1.5                                                                                                                                 | 0.497±0.003 | 0.503±0.002 | 0.491±0.002 | 0.496±0.002 | 0.499±0.002 | 0.487±0.003 |
| 2                                                                                                                                   | 0.539±0.002 | 0.547±0.002 | 0.538±0.002 | 0.540±0.003 | 0.544±0.002 | 0.533±0.002 |
| 2.5                                                                                                                                 | 0.558±0.002 | 0.567±0.002 | 0.560±0.002 | 0.560±0.002 | 0.564±0.002 | 0.556±0.002 |
| 3                                                                                                                                   | 0.567±0.002 | 0.578±0.002 | 0.572±0.002 | 0.569±0.002 | 0.574±0.003 | 0.568±0.002 |
| 3.5                                                                                                                                 | 0.572±0.002 | 0.583±0.002 | 0.578±0.003 | 0.574±0.002 | 0.579±0.002 | 0.574±0.002 |
| 4                                                                                                                                   | 0.574±0.002 | 0.586±0.002 | 0.581±0.002 | 0.576±0.002 | 0.582±0.002 | 0.577±0.002 |
| <b>Binding free energies based on 9Å-truncated NMEs of the MD trajectories (<math>\Delta G_{\text{nmode\_md\_9Å}}</math>)</b>       |             |             |             |             |             |             |
| 1                                                                                                                                   | -           | 0.340±0.004 | -           | -           | -           | -           |
| 1.5                                                                                                                                 | -           | 0.481±0.002 | -           | -           | -           | -           |
| 2                                                                                                                                   | -           | 0.541±0.002 | -           | -           | -           | -           |
| 2.5                                                                                                                                 | -           | 0.566±0.002 | -           | -           | -           | -           |

|     |   |             |   |   |   |   |
|-----|---|-------------|---|---|---|---|
| 3   | - | 0.578±0.003 | - | - | - | - |
| 3.5 | - | 0.584±0.002 | - | - | - | - |
| 4   | - | 0.588±0.002 | - | - | - | - |

The standard deviations were estimated by randomly sampling 80% of the tested dataset for 100 times.

**Table S3.** Overall accuracy of MM/PBSA results based on various calculation protocols.

| $\epsilon_{in}$ | enthalpy <sub>min</sub> | $\Delta G_{nmode\_min\_9\text{\AA}}$ | enthalpy <sub>md</sub> | $\Delta G_{nmode\_md\_9\text{\AA}}$ | $\Delta G_{interaction\_entropy}$ |
|-----------------|-------------------------|--------------------------------------|------------------------|-------------------------------------|-----------------------------------|
| 1               | -0.060±0.002            | -0.089±0.003                         | 0.184±0.003            | 0.050±0.002                         | 0.285±0.002                       |
| 2               | 0.130±0.003             | 0.084±0.002                          | 0.423±0.002            | 0.414±0.003                         | 0.479±0.002                       |
| 4               | 0.402±0.003             | 0.349±0.004                          | 0.538±0.002            | 0.557±0.002                         | 0.561±0.003                       |

The standard deviations were estimated by randomly sampling 80% of the tested dataset for 100 times.

**Table S4.** Prediction accuracy of MM/GBSA results of kinases based on various calculation protocols.

| $\epsilon_{in}$ | enthalpy <sub>min</sub> | enthalpy <sub>md</sub> | $\Delta G_{interaction\_entropy}$ | $\Delta G_{nmode\_min\_9\text{\AA}}$ | $\Delta G_{nmode\_md\_9\text{\AA}}$ | $\Delta G_{nmode\_md\_full\_length}$ |
|-----------------|-------------------------|------------------------|-----------------------------------|--------------------------------------|-------------------------------------|--------------------------------------|
| <b>ff03</b>     |                         |                        |                                   |                                      |                                     |                                      |
| 1               | 0.442±0.008             | 0.425±0.008            | 0.359±0.011                       | 0.426±0.008                          | 0.357±0.009                         | 0.392±0.008                          |
| 1.5             | 0.466±0.009             | 0.451±0.009            | 0.441±0.008                       | 0.445±0.012                          | 0.401±0.008                         | 0.439±0.012                          |
| 2               | 0.474±0.008             | 0.461±0.008            | 0.474±0.010                       | 0.451±0.008                          | 0.419±0.010                         | 0.456±0.008                          |
| 2.5             | 0.479±0.008             | 0.466±0.008            | 0.488±0.008                       | 0.453±0.008                          | 0.428±0.008                         | 0.465±0.008                          |
| 3               | 0.481±0.010             | 0.469±0.009            | 0.494±0.008                       | 0.454±0.009                          | 0.433±0.008                         | 0.469±0.009                          |
| 3.5             | 0.482±0.008             | 0.471±0.008            | 0.498±0.008                       | 0.454±0.008                          | 0.436±0.008                         | 0.472±0.009                          |
| 4               | 0.483±0.008             | 0.472±0.008            | 0.500±0.009                       | 0.454±0.009                          | 0.438±0.011                         | 0.474±0.008                          |
| <b>ff14SB</b>   |                         |                        |                                   |                                      |                                     |                                      |
| 1               | 0.463±0.009             | 0.447±0.008            | 0.375±0.008                       | 0.432±0.010                          | 0.433±0.009                         | -                                    |
| 1.5             | 0.478±0.008             | 0.465±0.008            | 0.447±0.009                       | 0.447±0.008                          | 0.476±0.012                         | -                                    |
| 2               | 0.482±0.008             | 0.470±0.009            | 0.473±0.008                       | 0.450±0.008                          | 0.490±0.010                         | -                                    |
| 2.5             | 0.483±0.008             | 0.472±0.008            | 0.482±0.008                       | 0.451±0.008                          | 0.497±0.008                         | -                                    |
| 3               | 0.483±0.010             | 0.473±0.009            | 0.486±0.008                       | 0.451±0.008                          | 0.500±0.009                         | -                                    |
| 3.5             | 0.484±0.008             | 0.474±0.008            | 0.488±0.008                       | 0.451±0.011                          | 0.502±0.008                         | -                                    |
| 4               | 0.484±0.008             | 0.474±0.008            | 0.489±0.011                       | 0.450±0.009                          | 0.503±0.008                         | -                                    |
| <b>ff02</b>     |                         |                        |                                   |                                      |                                     |                                      |
| 1               | 0.435±0.009             | 0.483±0.008            | 0.375±0.007                       | 0.350±0.008                          | 0.483±0.008                         | -                                    |
| 1.5             | 0.456±0.009             | 0.491±0.009            | 0.446±0.008                       | 0.379±0.012                          | 0.510±0.008                         | -                                    |
| 2               | 0.463±0.008             | 0.491±0.008            | 0.467±0.008                       | 0.389±0.008                          | 0.515±0.009                         | -                                    |
| 2.5             | 0.465±0.010             | 0.489±0.008            | 0.473±0.010                       | 0.393±0.009                          | 0.516±0.009                         | -                                    |
| 3               | 0.467±0.008             | 0.488±0.012            | 0.474±0.008                       | 0.395±0.008                          | 0.516±0.008                         | -                                    |
| 3.5             | 0.467±0.008             | 0.487±0.008            | 0.475±0.008                       | 0.396±0.008                          | 0.515±0.009                         | -                                    |

|                   |             |             |             |             |             |   |
|-------------------|-------------|-------------|-------------|-------------|-------------|---|
| 4                 | 0.468±0.011 | 0.486±0.008 | 0.477±0.009 | 0.397±0.012 | 0.514±0.008 | - |
| <b>ff99</b>       |             |             |             |             |             |   |
| 1                 | 0.449±0.008 | 0.445±0.008 | 0.362±0.008 | 0.283±0.009 | 0.397±0.008 | - |
| 1.5               | 0.472±0.007 | 0.461±0.008 | 0.442±0.008 | 0.311±0.008 | 0.437±0.008 | - |
| 2                 | 0.479±0.008 | 0.465±0.009 | 0.467±0.008 | 0.321±0.009 | 0.452±0.008 | - |
| 2.5               | 0.483±0.008 | 0.466±0.008 | 0.475±0.009 | 0.326±0.010 | 0.459±0.009 | - |
| 3                 | 0.484±0.008 | 0.467±0.008 | 0.477±0.011 | 0.329±0.008 | 0.463±0.012 | - |
| 3.5               | 0.485±0.008 | 0.467±0.008 | 0.476±0.008 | 0.331±0.008 | 0.465±0.008 | - |
| 4                 | 0.486±0.010 | 0.466±0.011 | 0.474±0.008 | 0.333±0.008 | 0.466±0.008 | - |
| <b>ff99SB</b>     |             |             |             |             |             |   |
| 1                 | 0.455±0.008 | 0.456±0.008 | 0.331±0.008 | 0.388±0.010 | 0.389±0.009 | - |
| 1.5               | 0.473±0.009 | 0.473±0.008 | 0.424±0.008 | 0.407±0.008 | 0.428±0.008 | - |
| 2                 | 0.479±0.008 | 0.477±0.009 | 0.457±0.009 | 0.413±0.008 | 0.441±0.010 | - |
| 2.5               | 0.481±0.008 | 0.479±0.008 | 0.470±0.008 | 0.415±0.007 | 0.447±0.008 | - |
| 3                 | 0.482±0.008 | 0.479±0.010 | 0.475±0.009 | 0.416±0.008 | 0.451±0.008 | - |
| 3.5               | 0.482±0.008 | 0.480±0.008 | 0.476±0.008 | 0.416±0.008 | 0.453±0.008 | - |
| 4                 | 0.483±0.008 | 0.480±0.008 | 0.477±0.008 | 0.416±0.011 | 0.454±0.011 | - |
| <b>ff99SBildn</b> |             |             |             |             |             |   |
| 1                 | 0.453±0.010 | 0.444±0.008 | 0.406±0.008 | 0.415±0.008 | 0.398±0.009 | - |
| 1.5               | 0.471±0.008 | 0.459±0.009 | 0.468±0.009 | 0.441±0.009 | 0.431±0.008 | - |
| 2                 | 0.477±0.008 | 0.464±0.008 | 0.485±0.008 | 0.449±0.008 | 0.442±0.010 | - |
| 2.5               | 0.479±0.008 | 0.466±0.010 | 0.490±0.011 | 0.453±0.008 | 0.447±0.008 | - |
| 3                 | 0.480±0.011 | 0.467±0.008 | 0.491±0.008 | 0.454±0.009 | 0.449±0.008 | - |
| 3.5               | 0.480±0.010 | 0.467±0.009 | 0.492±0.008 | 0.455±0.008 | 0.450±0.008 | - |
| 4                 | 0.481±0.008 | 0.467±0.008 | 0.493±0.010 | 0.455±0.008 | 0.451±0.011 | - |

The standard deviations were estimated by randomly sampling 80% of the tested dataset for 100 times.

**Table S5.** Prediction accuracy of MM/GBSA results of HIV proteases based on various calculation protocols.

| $\epsilon_{in}$ | enthalpy <sub>min</sub> | enthalpy <sub>md</sub> | $\Delta G_{interaction\_entropy}$ | $\Delta G_{nmode\_min\_9\text{\AA}}$ |
|-----------------|-------------------------|------------------------|-----------------------------------|--------------------------------------|
| <b>ff03</b>     |                         |                        |                                   |                                      |
| 1               | -0.060±0.012            | -0.010±0.013           | 0.204±0.011                       | 0.007±0.015                          |
| 1.5             | 0.064±0.013             | 0.086±0.015            | 0.235±0.012                       | 0.131±0.012                          |
| 2               | 0.135±0.012             | 0.138±0.012            | 0.244±0.012                       | 0.196±0.014                          |
| 2.5             | 0.178±0.015             | 0.169±0.012            | 0.252±0.013                       | 0.234±0.012                          |
| 3               | 0.206±0.012             | 0.188±0.016            | 0.258±0.012                       | 0.259±0.012                          |
| 3.5             | 0.226±0.012             | 0.202±0.012            | 0.263±0.012                       | 0.275±0.013                          |
| 4               | 0.241±0.014             | 0.212±0.011            | 0.268±0.014                       | 0.287±0.012                          |
| <b>ff14SB</b>   |                         |                        |                                   |                                      |
| 1               | -0.038±0.012            | 0.025±0.011            | 0.160±0.012                       | 0.006±0.012                          |
| 1.5             | 0.071±0.013             | 0.111±0.012            | 0.187±0.013                       | 0.115±0.012                          |
| 2               | 0.132±0.012             | 0.155±0.012            | 0.201±0.012                       | 0.173±0.012                          |
| 2.5             | 0.169±0.013             | 0.181±0.013            | 0.208±0.012                       | 0.207±0.013                          |
| 3               | 0.193±0.012             | 0.196±0.015            | 0.214±0.013                       | 0.229±0.012                          |
| 3.5             | 0.210±0.014             | 0.207±0.012            | 0.219±0.012                       | 0.244±0.014                          |
| 4               | 0.222±0.012             | 0.215±0.013            | 0.224±0.012                       | 0.255±0.012                          |
| <b>ff02</b>     |                         |                        |                                   |                                      |
| 1               | -0.007±0.012            | 0.018±0.012            | 0.234±0.011                       | 0.070±0.012                          |
| 1.5             | 0.096±0.013             | 0.099±0.013            | 0.253±0.012                       | 0.171±0.014                          |
| 2               | 0.153±0.012             | 0.142±0.012            | 0.248±0.012                       | 0.224±0.013                          |
| 2.5             | 0.187±0.012             | 0.167±0.012            | 0.237±0.013                       | 0.254±0.012                          |
| 3               | 0.209±0.013             | 0.183±0.014            | 0.231±0.012                       | 0.273±0.012                          |
| 3.5             | 0.224±0.012             | 0.194±0.012            | 0.227±0.012                       | 0.287±0.012                          |

|                   |              |              |             |              |
|-------------------|--------------|--------------|-------------|--------------|
| 4                 | 0.235±0.012  | 0.202±0.012  | 0.224±0.012 | 0.296±0.015  |
| <b>ff99</b>       |              |              |             |              |
| 1                 | -0.027±0.012 | -0.033±0.012 | 0.197±0.011 | 0.012±0.012  |
| 1.5               | 0.079±0.012  | 0.051±0.012  | 0.214±0.012 | 0.115±0.011  |
| 2                 | 0.139±0.013  | 0.098±0.012  | 0.214±0.012 | 0.170±0.012  |
| 2.5               | 0.176±0.012  | 0.126±0.012  | 0.209±0.013 | 0.202±0.013  |
| 3                 | 0.200±0.015  | 0.144±0.013  | 0.204±0.012 | 0.223±0.012  |
| 3.5               | 0.217±0.014  | 0.157±0.012  | 0.200±0.012 | 0.237±0.013  |
| 4                 | 0.229±0.012  | 0.166±0.013  | 0.197±0.014 | 0.248±0.012  |
| <b>ff99SB</b>     |              |              |             |              |
| 1                 | -0.035±0.015 | 0.078±0.012  | 0.253±0.011 | -0.010±0.012 |
| 1.5               | 0.075±0.012  | 0.152±0.012  | 0.285±0.012 | 0.102±0.013  |
| 2                 | 0.138±0.012  | 0.191±0.012  | 0.289±0.012 | 0.164±0.012  |
| 2.5               | 0.176±0.013  | 0.213±0.012  | 0.283±0.014 | 0.201±0.013  |
| 3                 | 0.201±0.012  | 0.226±0.012  | 0.276±0.012 | 0.225±0.012  |
| 3.5               | 0.219±0.012  | 0.235±0.013  | 0.271±0.012 | 0.242±0.012  |
| 4                 | 0.232±0.012  | 0.242±0.012  | 0.267±0.012 | 0.254±0.013  |
| <b>ff99SBildn</b> |              |              |             |              |
| 1                 | -0.051±0.013 | -0.021±0.013 | 0.132±0.011 | -0.027±0.013 |
| 1.5               | 0.064±0.013  | 0.082±0.012  | 0.182±0.012 | 0.088±0.012  |
| 2                 | 0.130±0.012  | 0.138±0.011  | 0.206±0.012 | 0.152±0.012  |
| 2.5               | 0.170±0.012  | 0.171±0.012  | 0.219±0.013 | 0.190±0.013  |
| 3                 | 0.196±0.012  | 0.191±0.012  | 0.229±0.012 | 0.214±0.012  |
| 3.5               | 0.214±0.013  | 0.206±0.014  | 0.237±0.012 | 0.231±0.012  |
| 4                 | 0.228±0.012  | 0.216±0.012  | 0.243±0.013 | 0.244±0.014  |

The standard deviations were estimated by randomly sampling 80% of the tested dataset for 100 times.

**Table S6.** Prediction accuracy of MM/GBSA results of thrombin-like proteins based on various calculation protocols.

| $\epsilon_{in}$ | enthalpy <sub>min</sub> | enthalpy <sub>md</sub> | $\Delta G_{interaction\_entropy}$ | $\Delta G_{nmode\_min\_9\text{\AA}}$ |
|-----------------|-------------------------|------------------------|-----------------------------------|--------------------------------------|
| <b>ff03</b>     |                         |                        |                                   |                                      |
| 1               | 0.678±0.005             | 0.641±0.006            | 0.403±0.004                       | 0.340±0.005                          |
| 1.5             | 0.782±0.005             | 0.742±0.005            | 0.597±0.005                       | 0.493±0.006                          |
| 2               | 0.797±0.007             | 0.766±0.005            | 0.679±0.005                       | 0.546±0.005                          |
| 2.5             | 0.798±0.005             | 0.773±0.006            | 0.718±0.005                       | 0.569±0.005                          |
| 3               | 0.796±0.006             | 0.776±0.005            | 0.738±0.006                       | 0.582±0.007                          |
| 3.5             | 0.794±0.006             | 0.778±0.005            | 0.750±0.005                       | 0.589±0.005                          |
| 4               | 0.792±0.005             | 0.778±0.005            | 0.757±0.005                       | 0.594±0.005                          |
| <b>ff14SB</b>   |                         |                        |                                   |                                      |
| 1               | 0.630±0.005             | 0.541±0.005            | 0.348±0.005                       | 0.448±0.006                          |
| 1.5             | 0.766±0.006             | 0.698±0.005            | 0.562±0.006                       | 0.581±0.005                          |
| 2               | 0.792±0.005             | 0.737±0.008            | 0.657±0.005                       | 0.618±0.007                          |
| 2.5             | 0.797±0.005             | 0.749±0.005            | 0.702±0.005                       | 0.631±0.005                          |
| 3               | 0.797±0.005             | 0.754±0.005            | 0.725±0.005                       | 0.638±0.005                          |
| 3.5             | 0.796±0.006             | 0.755±0.006            | 0.738±0.005                       | 0.641±0.006                          |
| 4               | 0.794±0.005             | 0.756±0.005            | 0.747±0.006                       | 0.643±0.005                          |
| <b>ff02</b>     |                         |                        |                                   |                                      |
| 1               | 0.681±0.006             | 0.651±0.005            | 0.403±0.005                       | 0.525±0.006                          |
| 1.5             | 0.773±0.005             | 0.734±0.005            | 0.595±0.006                       | 0.638±0.007                          |
| 2               | 0.789±0.005             | 0.749±0.005            | 0.664±0.005                       | 0.672±0.005                          |
| 2.5             | 0.792±0.005             | 0.753±0.006            | 0.692±0.005                       | 0.686±0.005                          |
| 3               | 0.792±0.006             | 0.753±0.005            | 0.705±0.006                       | 0.692±0.006                          |

|                   |             |             |             |             |
|-------------------|-------------|-------------|-------------|-------------|
| 3.5               | 0.791±0.005 | 0.753±0.005 | 0.714±0.005 | 0.695±0.005 |
| 4                 | 0.790±0.007 | 0.752±0.006 | 0.719±0.005 | 0.697±0.005 |
| <b>ff99</b>       |             |             |             |             |
| 1                 | 0.628±0.007 | 0.582±0.005 | 0.301±0.006 | 0.500±0.005 |
| 1.5               | 0.762±0.005 | 0.716±0.006 | 0.539±0.006 | 0.619±0.006 |
| 2                 | 0.788±0.005 | 0.747±0.005 | 0.637±0.005 | 0.649±0.005 |
| 2.5               | 0.794±0.005 | 0.756±0.006 | 0.680±0.005 | 0.659±0.005 |
| 3                 | 0.794±0.006 | 0.759±0.005 | 0.701±0.005 | 0.663±0.007 |
| 3.5               | 0.793±0.006 | 0.760±0.005 | 0.714±0.005 | 0.665±0.005 |
| 4                 | 0.792±0.005 | 0.761±0.007 | 0.721±0.006 | 0.666±0.005 |
| <b>ff99SB</b>     |             |             |             |             |
| 1                 | 0.634±0.005 | 0.585±0.005 | 0.364±0.004 | 0.491±0.006 |
| 1.5               | 0.764±0.005 | 0.706±0.005 | 0.564±0.005 | 0.609±0.005 |
| 2                 | 0.789±0.005 | 0.735±0.007 | 0.649±0.007 | 0.639±0.005 |
| 2.5               | 0.793±0.006 | 0.745±0.005 | 0.689±0.005 | 0.649±0.006 |
| 3                 | 0.792±0.005 | 0.749±0.005 | 0.710±0.005 | 0.653±0.005 |
| 3.5               | 0.791±0.006 | 0.750±0.007 | 0.721±0.005 | 0.655±0.006 |
| 4                 | 0.789±0.005 | 0.751±0.005 | 0.730±0.006 | 0.656±0.005 |
| <b>ff99SBildn</b> |             |             |             |             |
| 1                 | 0.627±0.006 | 0.613±0.005 | 0.413±0.005 | 0.359±0.005 |
| 1.5               | 0.760±0.005 | 0.726±0.005 | 0.609±0.005 | 0.494±0.004 |
| 2                 | 0.785±0.005 | 0.752±0.005 | 0.678±0.005 | 0.539±0.006 |
| 2.5               | 0.790±0.005 | 0.760±0.006 | 0.707±0.006 | 0.559±0.005 |
| 3                 | 0.790±0.006 | 0.763±0.005 | 0.720±0.007 | 0.569±0.006 |
| 3.5               | 0.789±0.006 | 0.764±0.007 | 0.726±0.006 | 0.575±0.005 |
| 4                 | 0.788±0.006 | 0.765±0.005 | 0.730±0.005 | 0.580±0.005 |

The standard deviations were estimated by randomly sampling 80% of the tested dataset for 100 times.

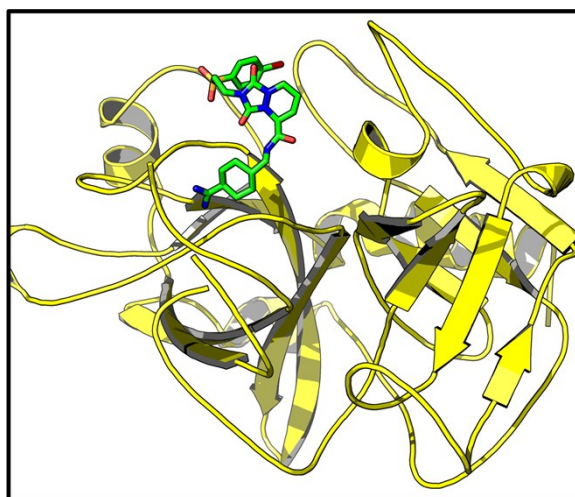

**Figure S1.** Structure of thrombin-like protein. The protein and co-crystallized ligand are shown in yellow cartoon model and green stick model, respectively. PDB code of 1C4U is used for the illustration.
